# Supplementary material for: Genomes of the dinoflagellate Polarella glacialis encode tandemly repeated single-exon genes with adaptive functions
Source: PubMed Central journal article supplement (PMC7245778; doi:10.1186/s12915-020-00782-8), 2020-05-24
Supplement: 12915_2020_782_MOESM2_ESM.pdf [file 12915_2020_782_MOESM2_ESM.pdf]

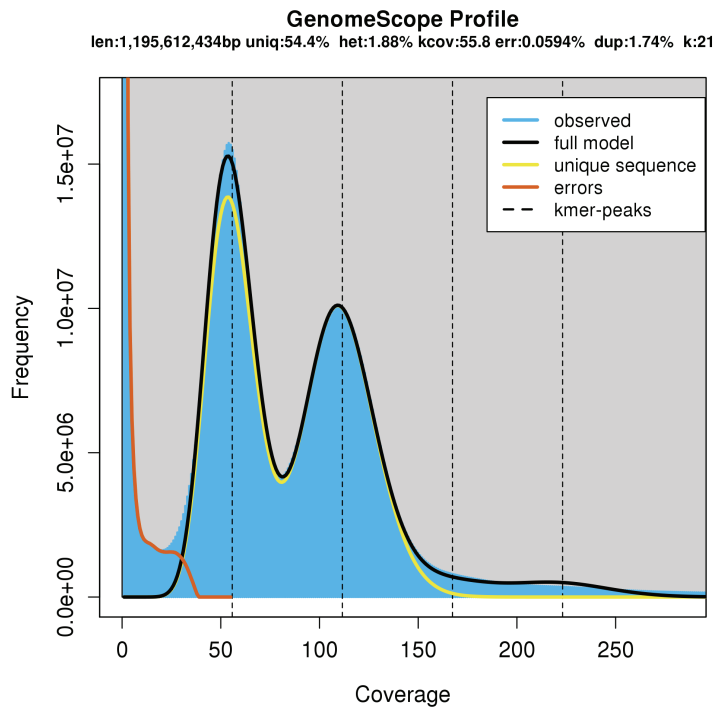

**Supplementary Figure 1.** GenomeScope 21-mer profile for CCMP2088.

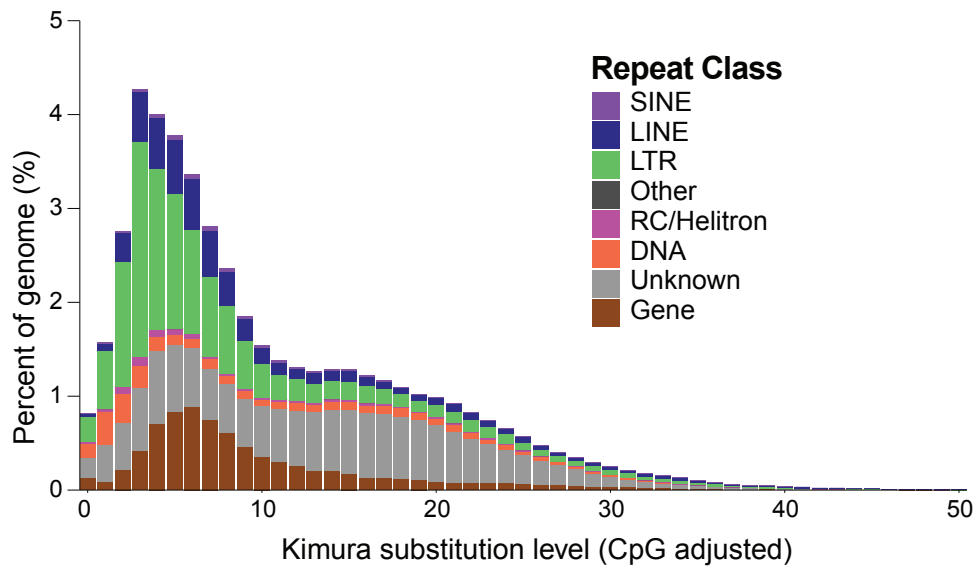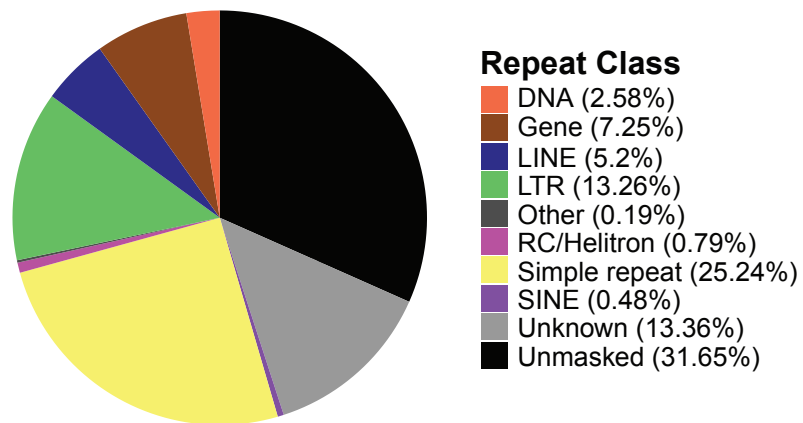

**Supplementary Figure 2.** Interspersed repeat landscape and proportion of distinct repeat classes in the assembled genome of CCMP2088, relative to sequence divergence in Kimura substitution level.

**a**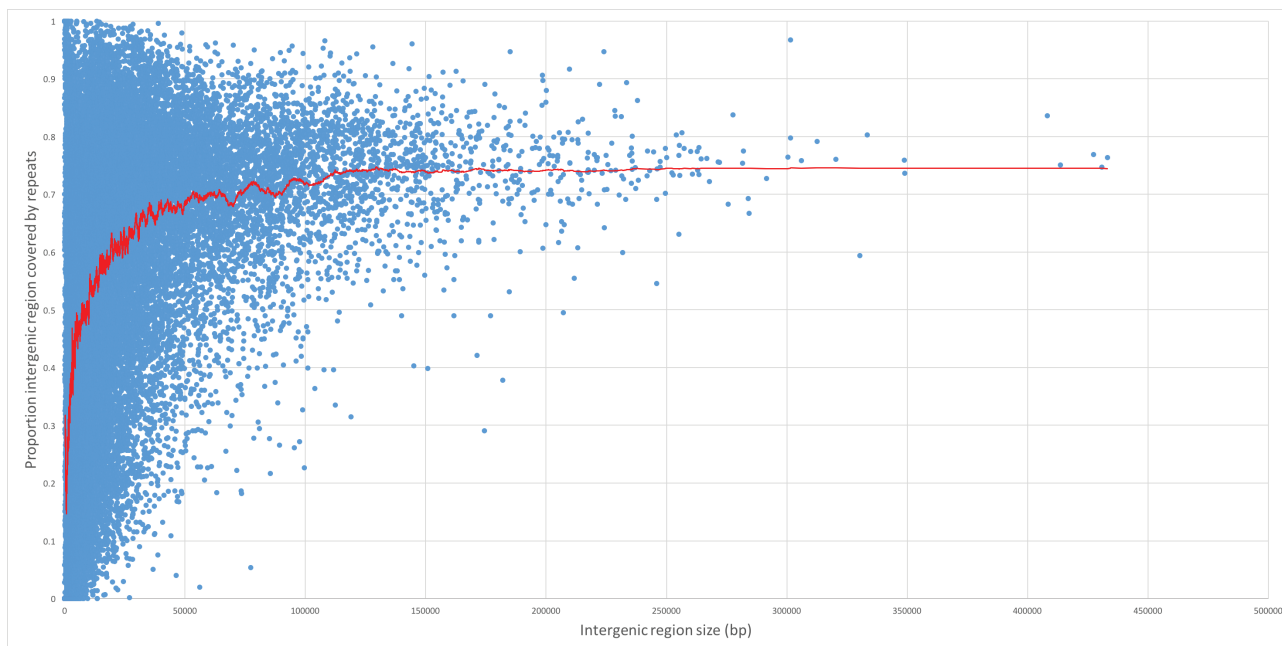**b**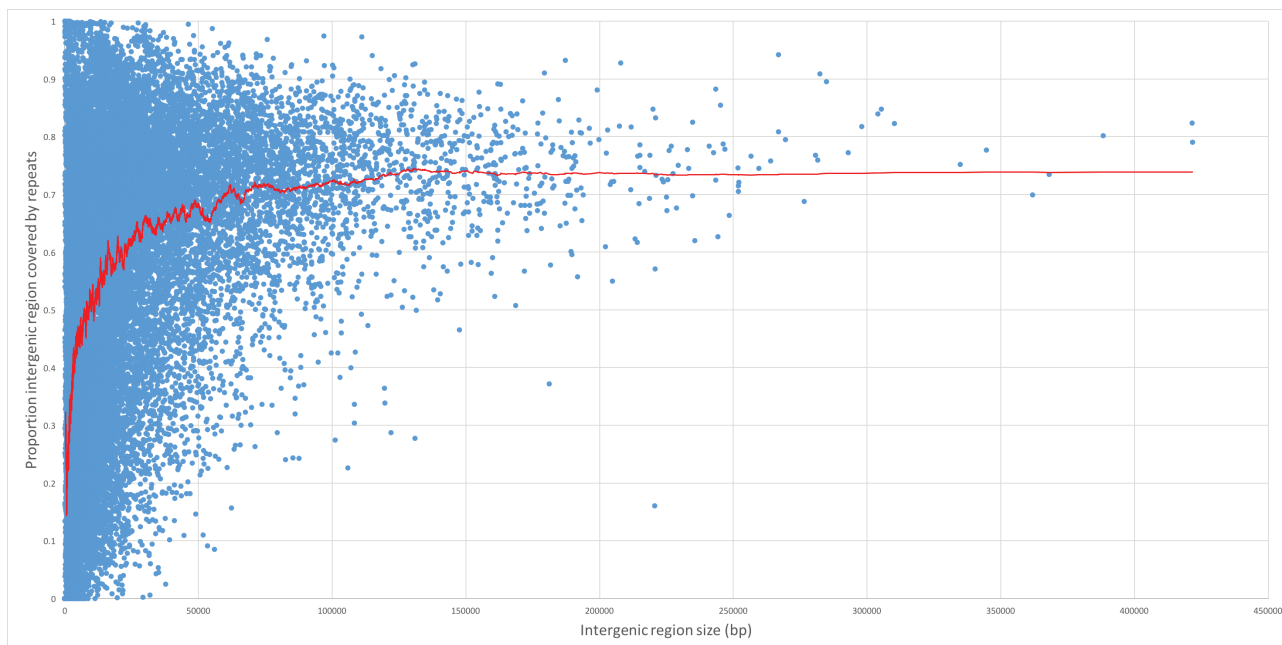

**Supplementary Figure 3.** Relationship between length of intergenic regions and their coverage by repeats for the predicted genes from (a) CCMP1383 and (b) CCMP2088. The red trend line was constructed using a moving average with a window size of 250.

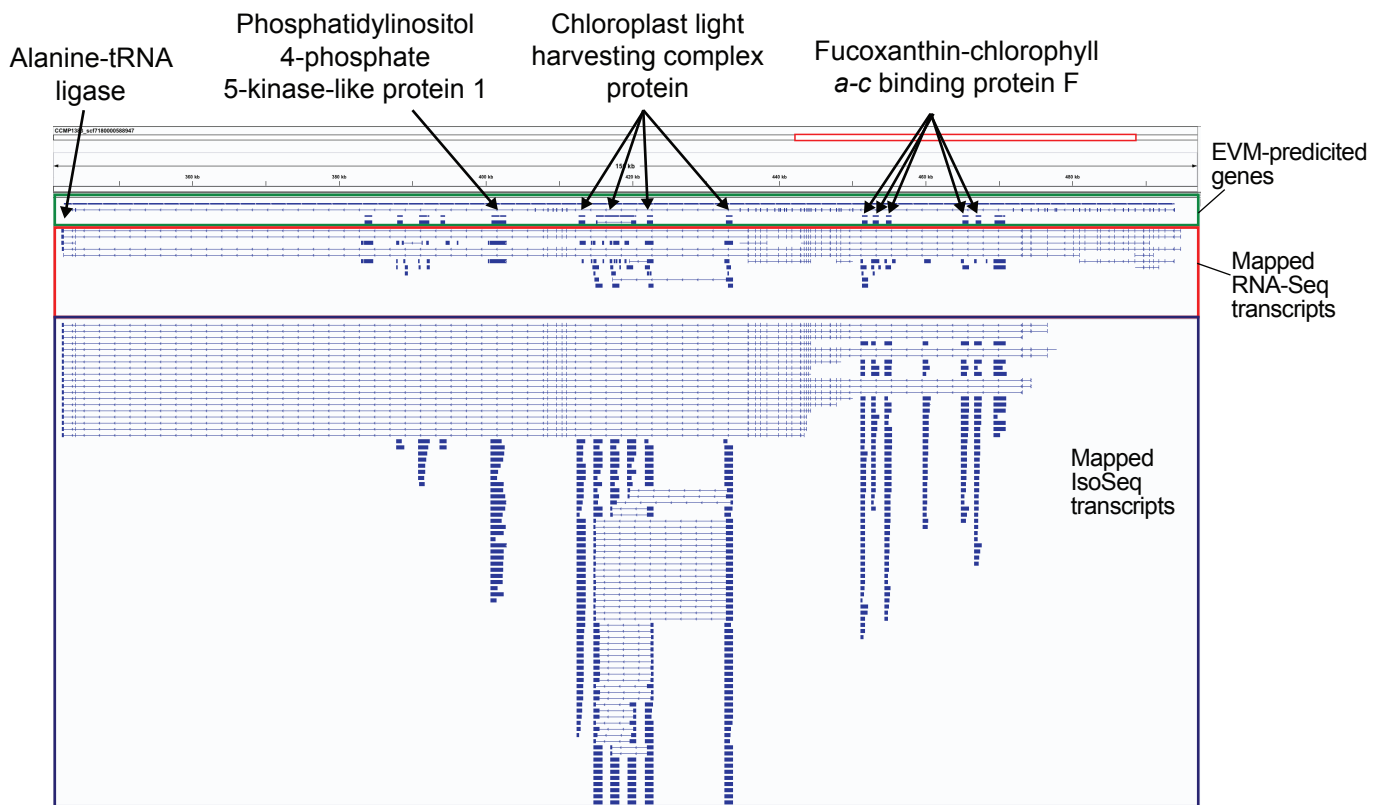

**Supplementary Figure 4.** An example of a genome region containing genes nested within the long introns of a putative alanine-tRNA ligase (from scaffold CCMP1383\_scf7180000588947). The EvidenceModeler predicted genes, mapped IsoSeq transcripts and mapped RNA-Seq transcripts are shown in the green, red and blue boxes.

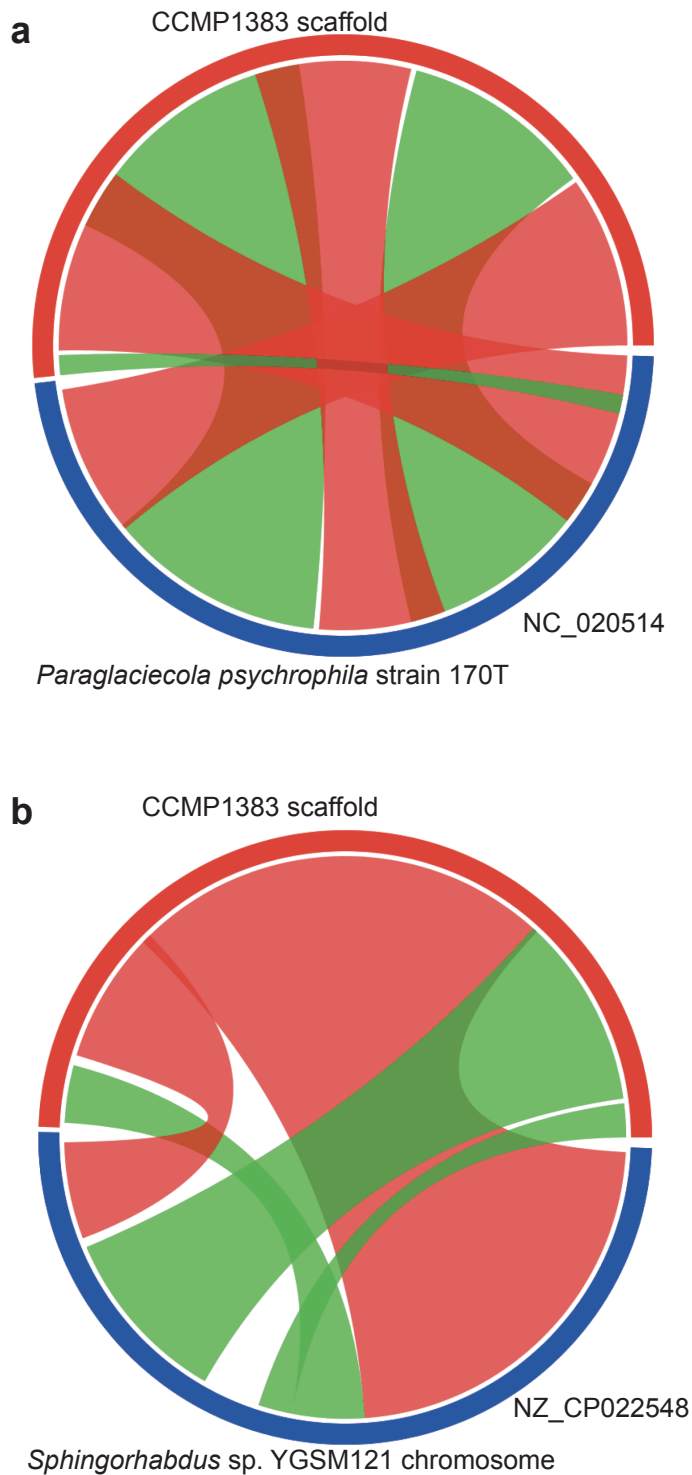

**Supplementary Figure 5.** Conserved synteny between the two sequenced bacterial scaffolds and the published (a) *Paraglaciecola psychrophila* strain 170T (GenBank NC\_020514) and (b) *Sphingorhabdus* sp. YGSM121 (GenBank NZ\_CP022548) genomes. Syntenic regions between the two sequences are shown with ribbons; red representing direct and green represents inverted regions.
