# Supplementary material for: Genomes of the dinoflagellate Polarella glacialis encode tandemly repeated single-exon genes with adaptive functions
Source: BMC Biol. 2020 May 24;18:56. doi: 10.1186/s12915-020-00782-8 (PMC7245778; doi:10.1186/s12915-020-00782-8)
Supplement: Supplementary file 3 — Additional file 3: Supplementary Tables 1 through 26. [file 12915_2020_782_MOESM3_ESM.xlsx]

## Sheet: Supp_Table_1
Supplementary Table 1: Statistics of P. glacialis and available dinoflagellate genome assemblies.
	P. glacialis CCMP1383					P. glacialis CCMP2088					S. microadriaticum	B. minutum	F. kawagutii	C. goreaui	F. kawagutii	S. tridacnidorum	Cladocopium sp. C92	Amoebophrya ceratii	Hematodinium sp.
	CLC	CLC+Redundans		MaSuRCA Raw	MaSuRCA Final	CLC	CLC+Redundans		MaSuRCA Raw	MaSuRCA Final	Aranda et al. 2016	Shoguchi et al. 2013	Lin et al. 2015	Liu et al. 2018	Liu et al. 2018	Shoguchi et al. 2018	Shoguchi et al. 2018	John et al. 2019	Gornik et al. 2015
Notes		Scaffolds >1Kbp	Scaffolds <1Kbp, mircobial + organelle sequences removed		Scaffolds <1Kbp, mircobial + organelle sequences removed		Scaffolds >1Kbp	Scaffolds <1Kbp, mircobial + organelle sequences removed		Scaffolds <1Kbp, mircobial + organelle sequences removed									Data unavalible; statistics as reported
%G+C	42.95	42.97	42.81	45.86	45.91	42.7	42.79	42.84	46.08	46.15	50.51	43.46	45.54	44.83	45.72	50.43	44.73	55.92	47.31
Total number of scaffolds	1309594	52780	51741	34506	33494	1393813	50502	49628	38661	37768	9695	21899	30040	41289	16959	16176	6686	2351	869500
Total assembled bases (bp)	1974427910	1421758950	1391366214	3011499073	2984680192	1728775265	1341913179	1328846084	2784185041	2756104381	808242489	609476485	935067369	1027792016	1048482934	766659703	704779698	87690817	4,769 Mbp
N50 length of scaffolds (bp)	2571	72434	71673	168113	170304	2104	60496	60467	128120	129205	573512	125226	380908	98034	268823	133469	248944	83970	17235
Maximum scaffold length (bp)	1510310	3839769	684962	2170995	2170995	474066	2147300	428745	1500384	1500384	3144590	810747	1914085	8337000	5159000	3919231	3913393	536766	186 Kbp
Total number of contigs	1599775	111423	109604	39589	38490	1860223	76865	75962	47605	46703	44516	32811	77989	267890	109980	65731	87403	11665	-
N50 length of contigs (bp)	1962	25690	25412	143570	144622	1397	35649	35568	101054	101691	33427	61492	35631	6576	35743	52829	38661	16154	-
Maximum contig length (bp)	638260	3839761	314996	2170995	2170995	474066	1371241	294632	1472750	1472750	329283	436713	270662	3449000	956496	2088687	2643202	142824	-
Number of scaffolds > 50 Kb	123	9274	9227	16321	16224	54	8787	8748	16533	16405	1955	3893	3178	6160	4204	4719	3285	576	-
% genome in scaffolds > 50 Kb	1.11	65.19	65.03	86.09	86.57	0.37	58.69	58.72	80.72	81.08	95.93	82.01	95.98	72.87	88.91	82.84	93.22	70.66	-
% gap	2.356	5.036	5.082	0.017	0.017	3.562	2.297	2.318	0.032	0.032	7.702	0.945	3.445	13.22	15.24	1.307	4.347	2.253	-

## Sheet: Supp_Table_2
Supplementary Table 2: PacBio genome sequencing data generated as part of this study. Sequencing providers: Queensland University of Technology (QUT) and Ramaciotti Centre for Genomics (RCG). Genome coverage was calculated using the estimated diploid genome sizes in Supplementary Table S3.
Sample	Library	Technology	Provider	Raw subreads					>5Kbp subreads
				Number	Bases	N50 length (Kbp)	Mean length	Genome coverage	Number	Bases	N50 length (Kbp)	Mean length	Genome coverage
CCMP1383	CCMP1383_LR1	PacBio Sequel	QUT	407925	2208055144	12.92	5412.89	0.732195	108722	1583132724	18.989	14561.3	0.52497
	CCMP1383_LR2	PacBio Sequel	QUT	715203	3580962204	11.844	5006.92	1.18745	166555	2432499612	18.913	14604.8	0.806622
	CCMP1383_LR3	PacBio Sequel	QUT	636823	4623806239	15.036	7260.74	1.53326	287005	4002905517	17.192	13947.2	1.32737
	CCMP1383_LR4	PacBio Sequel	QUT	740864	5002270261	14.18	6751.94	1.65876	316711	4270400975	16.358	13483.6	1.41607
	CCMP1383_LR5	PacBio Sequel	QUT	650912	5545526691	16.545	8519.63	1.83891	341761	4960789393	18.208	14515.4	1.64501
	CCMP1383_LR6	PacBio Sequel	QUT	649077	5224151151	16.975	8048.58	1.73234	307351	4592892397	18.932	14943.5	1.52301
	CCMP1383_LR7	PacBio Sequel	QUT	804556	6501200503	16.596	8080.48	2.15581	391851	5744274079	18.449	14659.3	1.90481
	CCMP1383_LR8	PacBio Sequel	QUT	573538	4821223794	17.086	8406.11	1.59873	287983	4278591064	18.876	14857.1	1.41879
	CCMP1383_LR9	PacBio Sequel	RCG	388657	3837386874	17.152	9873.45	1.27248	242690	3522767582	18.079	14515.5	1.16816
	CCMP1383_LR10	PacBio Sequel	RCG	388501	4004862739	18.058	10308.5	1.32802	243899	3707707067	18.705	15201.8	1.22948
	CCMP1383_LR11	PacBio Sequel	RCG	744706	6315794760	15.104	8480.92	2.09433	418377	5653016615	16.45	13511.8	1.87455
	CCMP1383_LR12	PacBio Sequel	RCG	653338	5547669446	15.214	8491.27	1.83962	364743	4952902802	16.61	13579.2	1.64239
	CCMP1383_LR13	PacBio Sequel	RCG	670754	6067198377	16.346	9045.34	2.01189	386744	5501202680	17.508	14224.4	1.82421
	CCMP1383_LR14	PacBio Sequel	RCG	637546	5776551172	16.426	9060.6	1.91552	367734	5237127520	17.608	14241.6	1.73664
	CCMP1383_LR15	PacBio Sequel	RCG	644260	5508142632	15.793	8549.56	1.82651	355391	4955124179	17.064	13942.7	1.64313
	TOTAL			9306660	74564801987		8011.98	24.7258	4587517	65395334206		14255.1	21.6852
CCMP2088	CCMP2088_LR1	PacBio Sequel	RCG	526569	5342335972	17.501	10145.6	2.01248	329308	4931461137	18.198	14975.2	1.8577
	CCMP2088_LR2	PacBio Sequel	RCG	516878	4586532963	16.885	8873.53	1.72777	280188	4111737104	17.962	14674.9	1.54891
	CCMP2088_LR3	PacBio Sequel	RCG	425473	4055763893	17.037	9532.36	1.52782	252320	3697582783	17.91	14654.3	1.39289
	CCMP2088_LR4	PacBio Sequel	RCG	552121	5185324963	17.225	9391.65	1.95333	318152	4722397902	18.155	14843.2	1.77895
	CCMP2088_LR5	PacBio Sequel	RCG	585178	5166362560	15.997	8828.7	1.94619	330256	4639343262	17.312	14047.7	1.74766
	CCMP2088_LR6	PacBio Sequel	RCG	685295	5850827210	15.719	8537.68	2.20403	374154	5234826479	17.076	13991.1	1.97198
	CCMP2088_LR7	PacBio Sequel	RCG	731143	5754449825	14.742	7870.48	2.16773	375530	5072861525	16.298	13508.5	1.91097
	TOTAL			4022657	35941597386		8934.79	13.5394	2259908	32410210192		14341.4	12.2091

## Sheet: Supp_Table_3
Supplementary Table 3: Mapping of trimmed genome sequencing reads against the final assemblies. The concordant mapping rate is the percentage of paired-reads that mapped with the expected orientation and insert size.
CCMP1383			CCMP2088
Short-read data	Mapping Rate		Short-read data	Mapping Rate
	Overall	Concordant		Overall	Concordant
CCMP1383-PE1	94.81	85.25	CCMP2088-PE1	93.31	90.7
CCMP1383-PE2	95.3	92.71	CCMP2088-PE2	92.16	89.53
CCMP1383-PE3	94.69	84.76	CCMP2088-PE3	93.34	90.86
CCMP1383-PE4	95.17	92.62	CCMP2088-PE4	93.07	90.18
CCMP1383-PE5	96.18	93.66	CCMP2088-PE5	93.01	89.33

## Sheet: Supp_Table_4
Supplementary Table 4: Genome size estimated for each isolate using k-mer analysis
k-mer	CCMP1383				CCMP2088
	Diploid	Haploid	Peak 1	Peak 2	Diploid	Haploid	Peak 1	Peak 2
17	2508568668	1217393618	33	68	2114134399	1047875311	57	115
19	2651026619	1305729529	33	67	2329649470	1133900184	55	113
21	2846122893	1401168194	32	65	2480963579	1217927575	54	110
23	3029230528	1467283537	31	64	2614061254	1282826356	53	108
25	3100992897	1525885394	31	63	2732946200	1353459070	52	105
27	3259611384	1577231315	30	62	2895362358	1405515708	50	103
29	3297064030	1648532015	30	60	2992180868	1451652104	49	101
31	3432693117	1687255939	29	59	3077523549	1507358473	48	98
Average:	3015663767	1.47881e+09			2.6546e+09	1.30006e+09

## Sheet: Supp_Table_5
Supplementary Table 5: Recovery of BUSCO and CEGMA proteins in the genome and predicted genes of both P. glacialis isolates
Sample			CCMP1383	CCMP2088
Genome	BUSCO (Eukaryote, n=303)	Single	55	64
		Duplicated	53	42
		Fragmented	17	13
		Missing	178	184
		TBLASTN Matches	103	103
	BUSCO (Alveolate-Stramenopile, n=234)	Single	25	21
		Duplicated	21	21
		Fragmented	1	1
		Missing	187	191
		TBLASTN Matches	112	111
	BUSCO (Protist, n=215)	Single	31	34
		Duplicated	28	31
		Fragmented	2	1
		Missing	154	149
		TBLASTN Matches	97	98
	CEGMA (n=458)	TBLASTN Matches	332	337
Predicted Genes	BUSCO (Eukaryote, n=303)	Single	108	105
		Duplicated	69	63
		Fragmented	43	42
		Missing	83	93
		BLASTP Matches	218	214
	BUSCO (Alveolate-Stramenopile, n=234)	Single	30	32
		Duplicated	27	25
		Fragmented	0	1
		Missing	177	176
		BLASTP Matches	212	202
	BUSCO (Protist, n=215)	Single	36	43
		Duplicated	44	34
		Fragmented	5	2
		Missing	130	136
		BLASTP Matches	194	188
	CEGMA (n=458)	BLASTP Matches	429	418

## Sheet: Supp_Table_6
Supplementary Table 6: 3-mers generated from genome and paired-end reads (paired-end reads were down sampled to 5%)
CCMP1383						CCMP2088
Genome			Paired-end Reads			Genome			Paired-end Reads
TAG	48020658	1.60922	TAG	142003158	1.68114	TAG	44310015	1.60828	CGG	228433900	1.64302
TAC	50502875	1.6924	CGG	145080558	1.71757	TAC	46860248	1.70084	TAG	234535878	1.68691
CGG	51352032	1.72085	TAC	147294708	1.74379	CGG	48298591	1.75305	TAC	238386120	1.7146
GGG	53961987	1.80831	GGG	154835413	1.83306	GGG	51351653	1.86386	GGG	251242056	1.80707
CGT	58743729	1.96856	CGT	162079592	1.91882	CGT	54422543	1.97533	CGT	263022874	1.89181
GCG	59715913	2.00113	GCG	169696720	2.009	GCG	55941270	2.03045	GCG	265001274	1.90604
TCC	65314191	2.18874	TAT	191814055	2.27084	TAT	60885469	2.2099	TCC	308399746	2.21818
TAT	66757227	2.23709	TCC	191987258	2.27289	TTA	61240887	2.2228	TCG	311475461	2.2403
TTA	67404285	2.25878	TTA	193936385	2.29597	TCC	61850898	2.24495	TAT	317106457	2.2808
GAT	68286573	2.28834	TCG	194014515	2.29689	AGT	63813266	2.31617	TTA	318019103	2.28737
AGT	68618263	2.29946	AGT	197096856	2.33338	GAT	63834333	2.31694	AGT	319060692	2.29486
TCG	68978867	2.31154	GAT	202112697	2.39276	TCG	64399511	2.33745	GAT	324894024	2.33682
CCT	69802744	2.33915	CCT	207410766	2.45549	CCT	65791349	2.38797	CCT	335185792	2.41084
GAG	73898619	2.47641	GTC	211431671	2.50309	GAG	69210169	2.51206	GTC	345177490	2.48271
GTC	75026565	2.51421	GGC	215985061	2.55699	GTC	69731071	2.53097	GGC	348988178	2.51012
GGC	75279450	2.52268	GGT	216083986	2.55817	GGC	70534954	2.56014	GGT	356679192	2.56543
GGT	76572135	2.566	GAG	229770056	2.72019	GGT	71101971	2.58072	GAG	367904672	2.64617
CAT	83096717	2.78465	CAT	240882528	2.85175	CAT	77296209	2.80555	CAT	393239292	2.82839
TCT	84626658	2.83592	ATT	247288291	2.92759	TCT	78161958	2.83697	ATT	404902234	2.91228
ATT	85546255	2.86673	TGA	254090218	3.00811	ATT	78270378	2.84091	TGA	407921898	2.934
TGA	88139540	2.95364	GTG	258935823	3.06548	TGA	81951267	2.97451	TTC	424691669	3.05462
TTC	89847270	3.01086	TTC	262708261	3.11014	TTC	83587986	3.03392	GTG	429526330	3.08939
GTG	93283160	3.126	TCT	265388597	3.14187	GTG	86444473	3.1376	TCT	432625537	3.11168
TGG	96011196	3.21742	TGG	272323846	3.22398	CTT	89187360	3.23715	TGG	452573716	3.25516
CTT	96202287	3.22383	CTT	282036264	3.33896	TGG	89398383	3.24481	CTT	459542648	3.30528
GCT	106915918	3.58285	GCT	302635999	3.58283	GCT	98888404	3.58926	GCT	498932113	3.5886
CTG	111842070	3.74793	CTG	319407836	3.78139	CTG	103947477	3.77289	CTG	525029314	3.7763
TGC	113690367	3.80987	TGC	321047136	3.8008	TGC	105270514	3.82091	TGC	527992624	3.79761
TTT	145481702	4.87522	TTT	402988854	4.77089	TTT	133121697	4.8318	TTT	651121317	4.68322
GTT	217269558	7.2809	GTT	577241842	6.83383	GTT	196561968	7.13443	GTT	991214751	7.12936
TGT	232148183	7.77949	TGT	619264069	7.33132	TGT	210260114	7.63162	TGT	1063737936	7.65099
TTG	241766618	8.10182	TTG	647960019	7.67104	TTG	219191089	7.95578	TTG	1106705419	7.96004
	2984103612			8446833038			2755117475			13903269707

## Sheet: Supp_Table_7
Supplementary Table 7: Number of PacBio transcripts from each isolate that encode DinoSL sequences. The number of transcripts with evidence of one or more relic DinoSL after their primary DinoSL are also shown.
	CCMP1383	CCMP2088
Total IsoSeq transcripts	435032	1266042
Transcripts with just DinoSL	55865	608139
Transcripts with DinoSL + 1xRelic	2953	29272
Transcripts with DinoSL + 2xRelic	84	574
Transcripts with DinoSL + 3xRelic	2	0
Transcripts with DinoSL + 4xRelic	0	30
DinoSL selected library	747959	0

## Sheet: Supp_Table_8
Supplementary Table 8: Number of IsoSeq transcripts that start at a given position in the DinoSL sequence.
Starting position in DinoSL	Base	CCMP138		CCMP2088
1	T	5228	8.87546	27724	4.34535
1	A	1340	2.27489	10570	1.6567
1	G	5	0.00848839	60	0.00940417
1 (non-canonical)	C	8	0.0135814	121	0.0189651
2	C	14744	25.0306	111277	17.4411
3	C	13	0.0220698	134	0.0210026
4	G	14	0.0237675	133	0.0208459
5	T	1465	2.4871	8084	1.26705
6	A	8763	14.8767	148534	23.2806
7	G	16	0.0271628	119	0.0186516
8	C	26754	45.4197	330123	51.7422
9	C	10	0.0169768	133	0.0208459
10	A	5	0.00848839	11	0.0017241
11	T	243	0.412536	992	0.155482
12	T	296	0.502513	0	0
		58904		638015

## Sheet: Supp_Table_9
Supplementary Table 9: Number of transcript "assemblies" (equivalent to isoforms) produced by PASA that contained DinoSL-type transcripts. A transcriptional unit (TU) is comprised of all overlapping transcript "assemblies".
	CCMP1383	CCMP2088
Total PASA isoforms	30463	22532
Total PASA TUs	24947	19750
Total isoforms constructed using all DinoSL-type transcripts	8714	6576
Isoforms with 1 x Relic DinoSL-type transcripts	716	623
Isoforms with 2 x Relic DinoSL-type transcripts	39	21
Isoforms with 3 x Relic DinoSL-type transcripts	1	0
Isoforms with 4 x Relic DinoSL-type transcripts	0	0
Isoforms with DinoSL selected transcripts	1187	0
DinoSL-type TUs	7146	5110
DinoSL-type TUs on scaffolds with other TUs	4716	3023
DinoSL-type TUs within 5 Kbp of another DinoSL TU	2379	1777

## Sheet: Supp_Table_10
Supplementary Table 10: Number of alternative splicing events identified using IsoSeq data by PASA in P. glacialis isolates.
	CCMP1383		CCMP2088
	No.	%	No.	%
Alternative exon	6194	31.81	3344	45.85
Alternative donor site	4554	23.39	1608	22.05
Alternative acceptor site	3564	18.3	1490	20.43
Ends in intron	520	2.67	192	2.63
Starts in intron	649	3.33	150	2.06
Skipped exon	1198	6.15	134	1.84
Retained exon	1198	6.15	134	1.84
Spliced intron	798	4.1	121	1.66
Retained intron	798	4.1	121	1.66

[truncated: 16 more sheets: Supp_Table_11, Supp_Table_12, Supp_Table_13, Supp_Table_14, Supp_Table_15, Supp_Table_16, Supp_Table_17, Supp_Table_18, Supp_Table_19, Supp_Table_20, Supp_Table_21, Supp_Table_22, Supp_Table_23, Supp_Table_24, Supp_Table_25, Supp_Table_26]
